# Supplementary material
Source: PubMed Central journal article supplement (PMC6249031)
Supplement: NIHMS994337-supplement-SI.pdf [file NIHMS994337-supplement-SI.pdf]

## Supporting Information

### **Verteporfin-loaded poly(ethylene glycol)-poly(beta-amino ester)- poly(ethylene glycol) triblock micelles for cancer therapy**

Jayoung Kim<sup>1,2,#</sup>, James G. Shamul<sup>1,2,#</sup>, Sagar R. Shah<sup>1,2,3,#</sup>, Alyssa Shin<sup>2</sup>, Ben J. Lee<sup>1,2</sup>, Alfredo Quinones-Hinojosa<sup>3</sup>, Jordan J. Green<sup>1,2,4,5,\*</sup>

<sup>1</sup> Department of Biomedical Engineering and Institute for NanoBioTechnology, Johns Hopkins School of Medicine, Baltimore, MD 21231

<sup>2</sup> Translational Tissue Engineering Center, Johns Hopkins School of Medicine, Baltimore, MD 21231

<sup>3</sup> Department of Neurosurgery, Mayo Clinic, Jacksonville, FL 32224

<sup>4</sup> Department of Oncology, the Sidney Kimmel Comprehensive Cancer, and the Bloomberg~Kimmel Institute for Cancer Immunotherapy, Johns Hopkins School of Medicine, Baltimore, MD 21231

<sup>5</sup> Department of Ophthalmology, Department of Neurosurgery, Department of Materials Science and Engineering, and Department of Chemical and Biomolecular Engineering, Johns Hopkins University, Baltimore, MD 21218

# These authors contributed equally

\* To whom correspondence should be addressed: green@jhu.edu

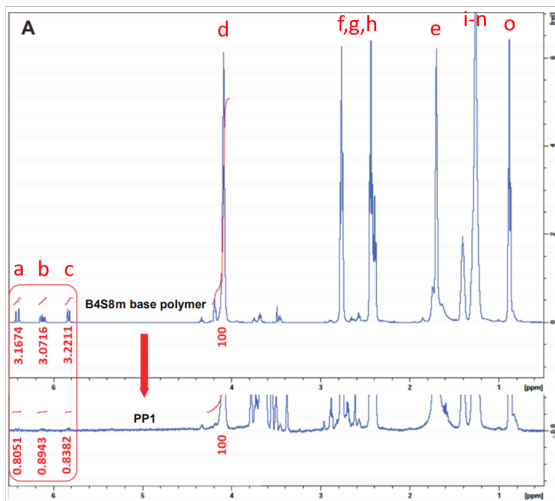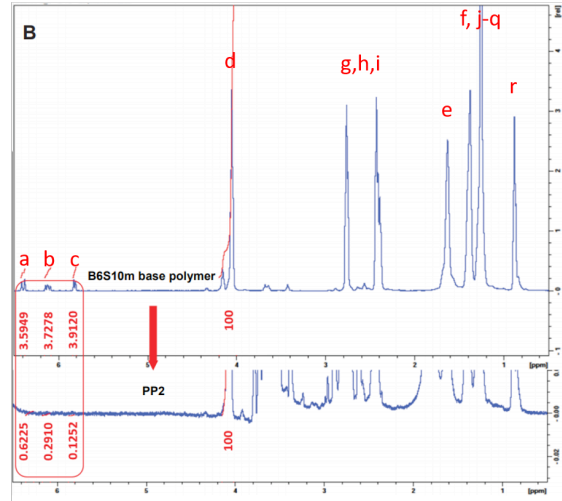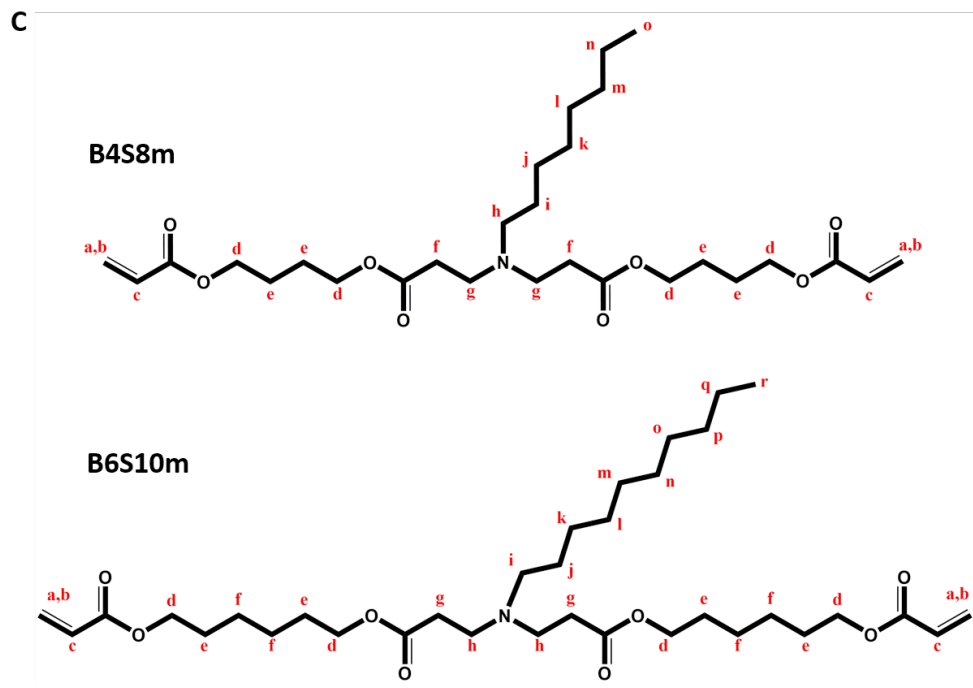

B4S8m:

0.85-1.00 (o, 3H, t, NCH<sub>2</sub>CH<sub>2</sub>CH<sub>2</sub>CH<sub>2</sub>CH<sub>2</sub>CH<sub>2</sub>CH<sub>2</sub>CH<sub>3</sub>)

1.2-1.35 (j/k/l/m/n, 10H, br, NCH<sub>2</sub>CH<sub>2</sub>CH<sub>2</sub>CH<sub>2</sub>CH<sub>2</sub>CH<sub>2</sub>CH<sub>2</sub>CH<sub>3</sub>),

1.35-1.45 (i, 2H, br, NCH<sub>2</sub>CH<sub>2</sub>CH<sub>2</sub>CH<sub>2</sub>CH<sub>2</sub>CH<sub>2</sub>CH<sub>3</sub>),

1.65-1.8 (e, 4H, br, CH<sub>2</sub>CH<sub>2</sub>NCH<sub>2</sub>CH<sub>2</sub>(COO)CH<sub>2</sub>CH<sub>2</sub>CH<sub>2</sub>CH<sub>2</sub>(COO)),

2.3-2.4 (f/h, 6H, br, **CH<sub>2</sub>CH<sub>2</sub>NCH<sub>2</sub>CH<sub>2</sub>(COO)CH<sub>2</sub>CH<sub>2</sub>CH<sub>2</sub>CH<sub>2</sub>(COO)** and **NCH<sub>2</sub>CH<sub>2</sub>CH<sub>2</sub>CH<sub>2</sub>CH<sub>2</sub>OH**),

2.6-2.7 (g, 4H, br, CH<sub>2</sub>**CH<sub>2</sub>NCH<sub>2</sub>CH<sub>2</sub>(COO)CH<sub>2</sub>CH<sub>2</sub>CH<sub>2</sub>CH<sub>2</sub>(COO)**),

3.9-4.05 (d, 4H, br, CH<sub>2</sub>CH<sub>2</sub>NCH<sub>2</sub>CH<sub>2</sub>(COO)**CH<sub>2</sub>CH<sub>2</sub>CH<sub>2</sub>CH<sub>2</sub>(COO)**),

5.9-6 (b, 1H, d, COOCH=**CH<sub>2</sub>**),

6.1-6.2 (c, 1H, dd, COO**CH=CH<sub>2</sub>**),

6.3-6.4 (a, 1H, d, COOCH=**CH<sub>2</sub>**)

B6S10m:

0.85-1.00 (r, 3H, t, NCH<sub>2</sub>CH<sub>2</sub>CH<sub>2</sub>CH<sub>2</sub>CH<sub>2</sub>CH<sub>2</sub>CH<sub>2</sub>CH<sub>2</sub>**CH<sub>3</sub>**)

1.2-1.35 (k/l/m/n/o/p/q, 14H, br, NCH<sub>2</sub>CH<sub>2</sub>**CH<sub>2</sub>CH<sub>2</sub>CH<sub>2</sub>CH<sub>2</sub>CH<sub>2</sub>CH<sub>2</sub>CH<sub>3</sub>**),

1.35-1.45 (j/f, 6H, br, NCH<sub>2</sub>**CH<sub>2</sub>CH<sub>2</sub>CH<sub>2</sub>CH<sub>2</sub>CH<sub>2</sub>CH<sub>2</sub>CH<sub>2</sub>CH<sub>3</sub>** and **CH<sub>2</sub>CH<sub>2</sub>NCH<sub>2</sub>CH<sub>2</sub>(COO)CH<sub>2</sub>CH<sub>2</sub>CH<sub>2</sub>CH<sub>2</sub>CH<sub>2</sub>(COO)**),

1.65-1.8 (e, 4H, br, CH<sub>2</sub>CH<sub>2</sub>NCH<sub>2</sub>CH<sub>2</sub>(COO)CH<sub>2</sub>**CH<sub>2</sub>CH<sub>2</sub>CH<sub>2</sub>CH<sub>2</sub>(COO)**),

2.3-2.4 (g/i, 6H, m, **CH<sub>2</sub>CH<sub>2</sub>NCH<sub>2</sub>CH<sub>2</sub>(COO)CH<sub>2</sub>CH<sub>2</sub>CH<sub>2</sub>CH<sub>2</sub>(COO)** and **NCH<sub>2</sub>CH<sub>2</sub>CH<sub>2</sub>CH<sub>2</sub>CH<sub>2</sub>OH**),

2.6-2.7 (h, 4H, t, CH<sub>2</sub>**CH<sub>2</sub>NCH<sub>2</sub>CH<sub>2</sub>(COO)CH<sub>2</sub>CH<sub>2</sub>CH<sub>2</sub>CH<sub>2</sub>(COO)**),

3.9-4.05 (d, 4H, br t, CH<sub>2</sub>CH<sub>2</sub>NCH<sub>2</sub>CH<sub>2</sub>(COO)**CH<sub>2</sub>CH<sub>2</sub>CH<sub>2</sub>CH<sub>2</sub>CH<sub>2</sub>CH<sub>2</sub>(COO)**),

5.9-6 (b, 1H, d, COOCH=**CH<sub>2</sub>**),

6.1-6.2 (c, 1H, dd, COO**CH=CH<sub>2</sub>**),

6.3-6.4 (a, 1H, d, COOCH=**CH<sub>2</sub>**)

**D**

| PBAE base polymer | Molecular Weight (Da) | Partition Coefficient (logP) |
|-------------------|-----------------------|------------------------------|
| B4S8m             | 5100                  | 4.71                         |
| B6S10m            | 4305                  | 6.63                         |

**Figure S1. Polymer characterization.** <sup>1</sup>H NMR spectra for the backbone PBAE (top) and the PEG-thiol endcapped PBAE (bottom) for (A) PP1 and (B) PP2 polymers. The absence of the acrylate peaks (red box) in the copolymer plot confirms that methoxy-PEG-thiol has successfully conjugated to the diacrylate ends of the PBAE base polymer. (C) Polymer structure of B4S8m and B6S10m PBAE base polymers with letters to indicate corresponding hydrogen peaks in NMR spectra. (D) Molecular weight and partition coefficient of two base PBAE polymers used to synthesize PEGylated triblock copolymer.

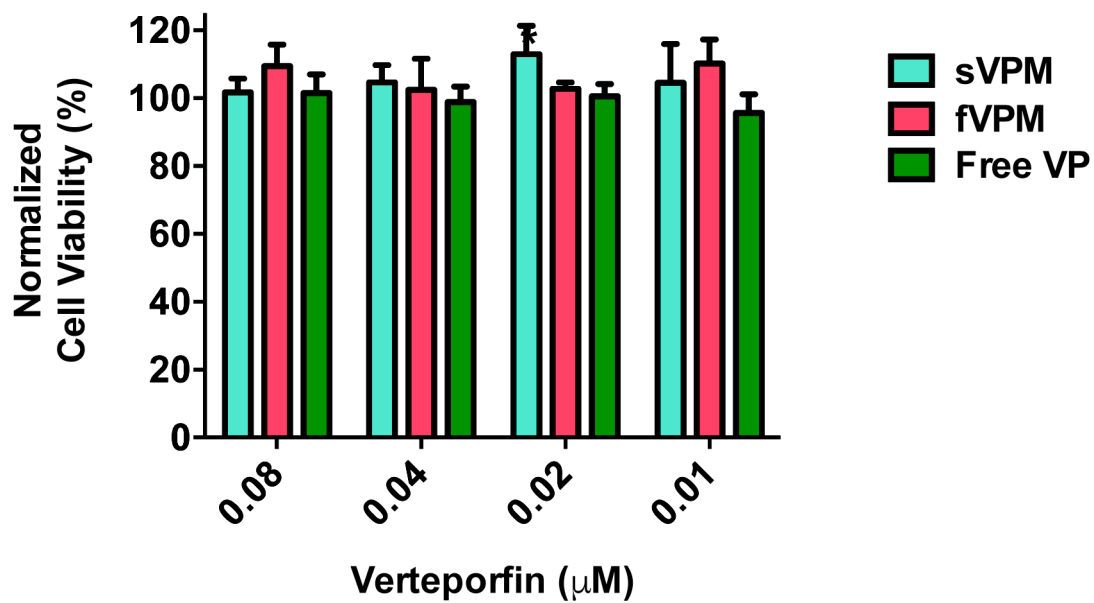

**Figure S2. RAW 264.7 cell viability.** Metabolic activity measured by MTS assay of macrophages 24 h post-treatment with free VP, sVPM, and fVPM at concentrations ranging from 0.01 – 0.08  $\mu\text{M}$  (n=4, mean  $\pm$  SD, One-way ANOVA with Tukey post-hoc test).

A

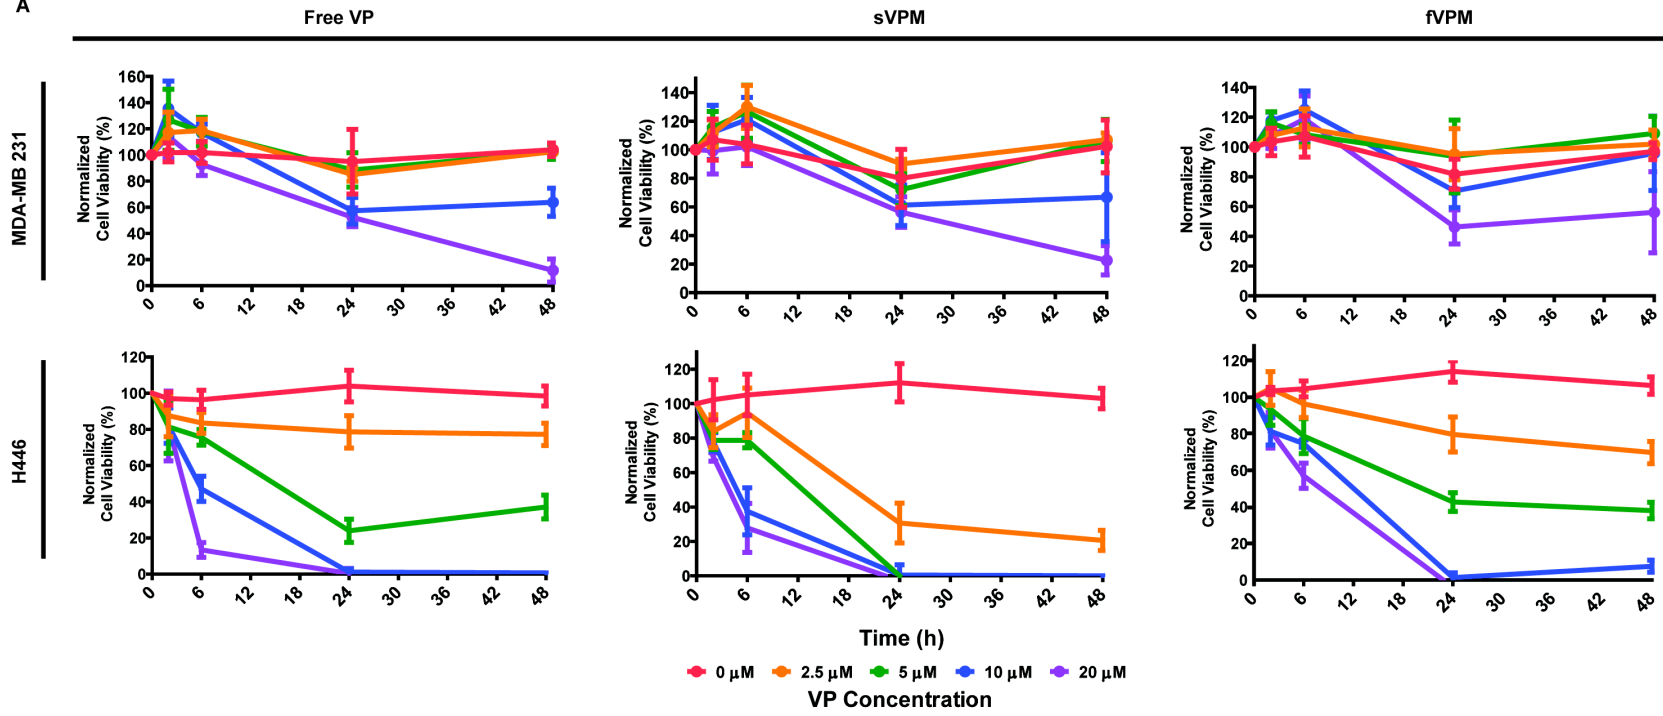

B

| MDA-MB 231 |             | 2 hr      |             |           |            |            | 6 hr      |             |           |            |            | 24 hr     |             |           |            |            | 48 hr     |             |           |            |            |  |
|------------|-------------|-----------|-------------|-----------|------------|------------|-----------|-------------|-----------|------------|------------|-----------|-------------|-----------|------------|------------|-----------|-------------|-----------|------------|------------|--|
|            |             | 0 $\mu$ M | 2.5 $\mu$ M | 5 $\mu$ M | 10 $\mu$ M | 20 $\mu$ M | 0 $\mu$ M | 2.5 $\mu$ M | 5 $\mu$ M | 10 $\mu$ M | 20 $\mu$ M | 0 $\mu$ M | 2.5 $\mu$ M | 5 $\mu$ M | 10 $\mu$ M | 20 $\mu$ M | 0 $\mu$ M | 2.5 $\mu$ M | 5 $\mu$ M | 10 $\mu$ M | 20 $\mu$ M |  |
| Free VP    | 2.5 $\mu$ M | ns        |             |           |            |            |  |
|            | 5 $\mu$ M   | ns        | ns          |           |            |            |  |
|            | 10 $\mu$ M  | ns        | ns          | ns        |            |            | ns        | ns          | ns        |            |            | *         | ns          | ns        |            |            | ***       | ***         | ***       |            |            |  |
|            | 20 $\mu$ M  | ns        | ns          | ns        | ns         |            | ns        | **          | **        | *          |            | **        | *           | *         | ns         |            | ***       | ***         | ***       | ***        |            |  |
| sVPM       | 2.5 $\mu$ M | ns        |             |           |            |            |  |
|            | 5 $\mu$ M   | ns        | ns          |           |            |            |  |
|            | 10 $\mu$ M  | ns        | ns          | ns        |            |            |  |
|            | 20 $\mu$ M  | ns        | ns          | ns        | ns         |            | ns        | ns          | ns        | ns         |            | ns        | *           | ns        | ns         |            | ***       | ***         | ***       | *          |            |  |
| fVPM       | 2.5 $\mu$ M | ns        |             |           |            |            |  |
|            | 5 $\mu$ M   | ns        | ns          |           |            |            |  |
|            | 10 $\mu$ M  | ns        | ns          | ns        |            |            |  |
|            | 20 $\mu$ M  | ns        | ns          | ns        | ns         |            | ns        | ns          | ns        | ns         |            | ns        | **          | **        | ns         |            | ns        | *           | **        | ns         |            |  |

| H446    |             | 2 hr      |             |           |            |            | 6 hr      |             |           |            |            | 24 hr     |             |           |            |            | 48 hr     |             |           |            |            |  |
|---------|-------------|-----------|-------------|-----------|------------|------------|-----------|-------------|-----------|------------|------------|-----------|-------------|-----------|------------|------------|-----------|-------------|-----------|------------|------------|--|
|         |             | 0 $\mu$ M | 2.5 $\mu$ M | 5 $\mu$ M | 10 $\mu$ M | 20 $\mu$ M | 0 $\mu$ M | 2.5 $\mu$ M | 5 $\mu$ M | 10 $\mu$ M | 20 $\mu$ M | 0 $\mu$ M | 2.5 $\mu$ M | 5 $\mu$ M | 10 $\mu$ M | 20 $\mu$ M | 0 $\mu$ M | 2.5 $\mu$ M | 5 $\mu$ M | 10 $\mu$ M | 20 $\mu$ M |  |
| Free VP | 2.5 $\mu$ M | ns        |             |           |            |            | *         |             |           |            |            | ***       |             |           |            |            | ***       |             |           |            |            |  |
|         | 5 $\mu$ M   | ns        | ns          |           |            |            | ns        | ***         |           |            |            | ***       | ***         |           |            |            | ***       | ***         |           |            |            |  |
|         | 10 $\mu$ M  | ns        | ns          | ns        |            |            | ***       | ***         | ***       |            |            | ***       | ***         | **        |            |            | ***       | ***         | ***       |            |            |  |
|         | 20 $\mu$ M  | ns        | ns          | ns        | ns         |            | ***       | ***         | ***       | ***        |            | ***       | ***         | **        | ns         |            | ***       | ***         | ***       | ns         |            |  |
| sVPM    | 2.5 $\mu$ M | 8         |             |           |            |            | ns        |             |           |            |            | ***       |             |           |            |            | ***       |             |           |            |            |  |
|         | 5 $\mu$ M   | **        | ns          |           |            |            | ns        | ns          |           |            |            | ***       | ***         |           |            |            | ***       | ***         |           |            |            |  |
|         | 10 $\mu$ M  | **        | ns          | ns        |            |            | ***       | ***         | **        |            |            | ***       | ***         | ns        |            |            | ***       | ***         | ns        |            |            |  |
|         | 20 $\mu$ M  | ***       | ns          | ns        | ns         |            | ***       | ***         | ***       | ns         |            | ***       | ***         | ns        | ns         |            | ***       | ***         | ns        | ns         |            |  |
| fVPM    | 2.5 $\mu$ M | ns        |             |           |            |            | ns        |             |           |            |            | ***       |             |           |            |            | ***       |             |           |            |            |  |
|         | 5 $\mu$ M   | ns        | ns          |           |            |            | ***       | *           |           |            |            | ***       | ***         |           |            |            | ***       | ***         |           |            |            |  |
|         | 10 $\mu$ M  | *         | **          | ns        |            |            | ***       | **          | ns        |            |            | ***       | ***         | ***       |            |            | ***       | ***         | ***       |            |            |  |
|         | 20 $\mu$ M  | *         | *           | ns        | ns         |            | ***       | ***         | **        | *          |            | ***       | ***         | ***       | ns         |            | ***       | ***         | ***       | ns         |            |  |

C

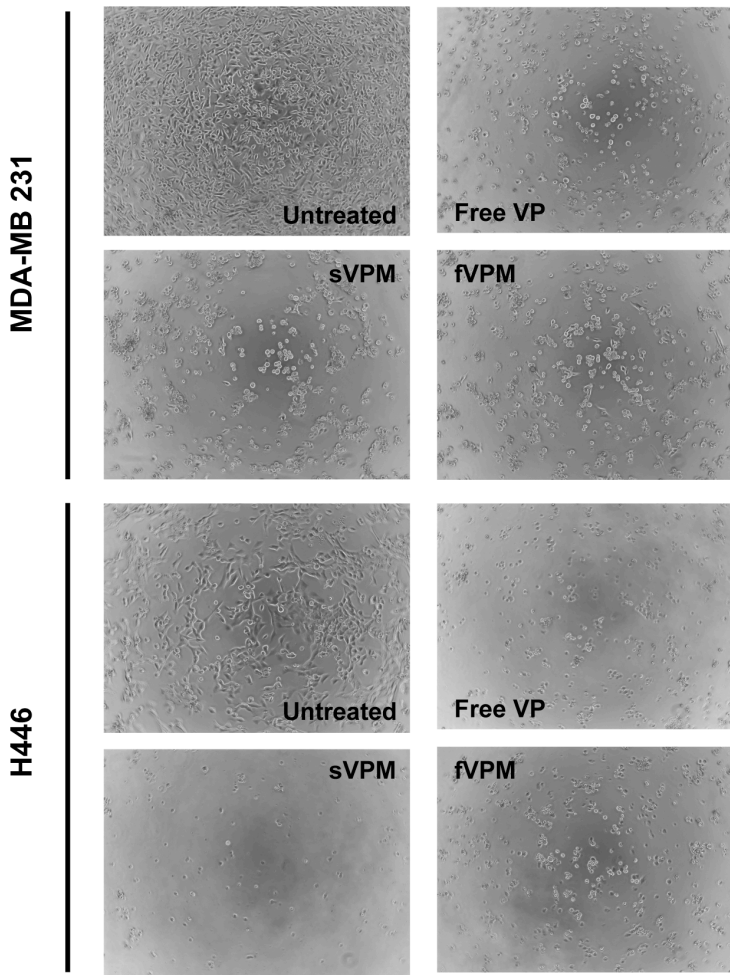

Scale bar: 100  $\mu\text{m}$   
[VP] = 20  $\mu\text{M}$  for MDA-MB 231 and 5  $\mu\text{M}$  for H446

**Figure S3. VP-induced cell death.** (A) Cell killing kinetics with free VP, sVPM, and fVPM measured at 2, 6, 24, and 48 hr timepoints at equivalent VP concentrations from 2.5 - 20  $\mu\text{M}$  ( $n=4$ , mean  $\pm$  SD, One-way ANOVA with Tukey post-hoc test), (B) statistical analysis summary, and (C) representative bright-field image of MDA-MB 231 and H446 cells at stated VP concentration at 24 hr.
